# Supplementary material
Source: PubMed Central journal article supplement (PMC2708706)
Supplement: 0812789106_0812789106SI.pdf [file 0812789106_0812789106SI.pdf]

# Supporting Information

Grimaldi et al. 10.1073/pnas.0812789106

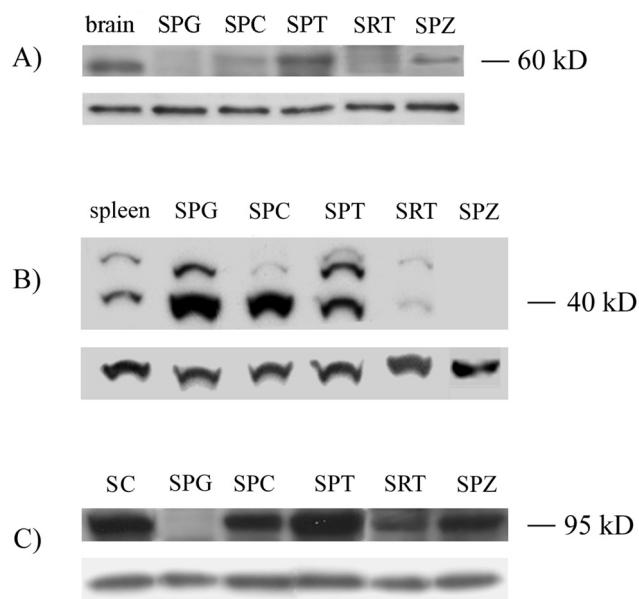

**Fig. S1.** Cannabinoid and TRPV1 receptor protein expression in differentiating male mouse germ cells. Immunoblot analysis of CB<sub>1</sub> (A), CB<sub>2</sub> (B), and TRPV1 receptors (C) was performed as described in *Methods*. Cell extracts were prepared from isolated mouse spermatogonia from 7 dpp mice or from spermatocyte and spermatids obtained by elutriation from 40 dpp mouse testes. Spermatozoa were isolated from cauda of the epididymis. Sertoli cells were obtained from 7 dpp mice. (B) Cell extracts from mouse brain, spleen, and spinal cord (SC) were used as positive controls of CB<sub>1</sub>, CB<sub>2</sub>, and TRPV1 expression, respectively. The molecular weights of the main bands were, as expected, ≈60, 40, and 95 kDa for CB<sub>1</sub>, CB<sub>2</sub> and TRPV1 receptors, respectively. Actin was used as loading reference. Abbreviations are as in Fig. 1.

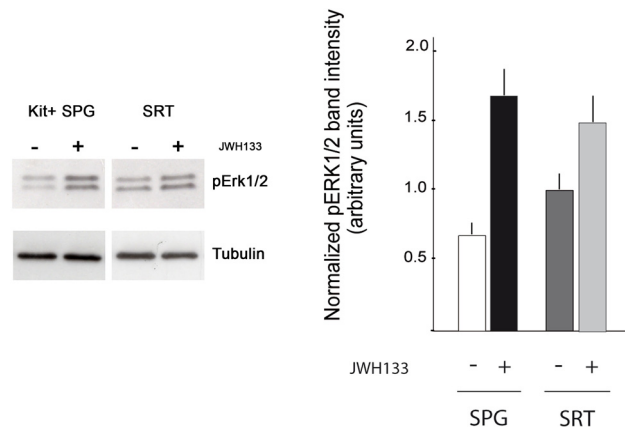

**Fig. S2.** MAPK Erk1/2 is activated by the CB<sub>2</sub> specific agonist JWH133 in purified kit-positive spermatogonia. Western blot analyses of phosphoErk1/2 in cell extracts from control or JWH133 (1 μM)-treated kit-positive spermatogonia and from control or JWH133 (1 μM)-treated Sertoli cells from 7dpp. Densitometric analysis of normalized phosphoERKs is shown on the right panel.

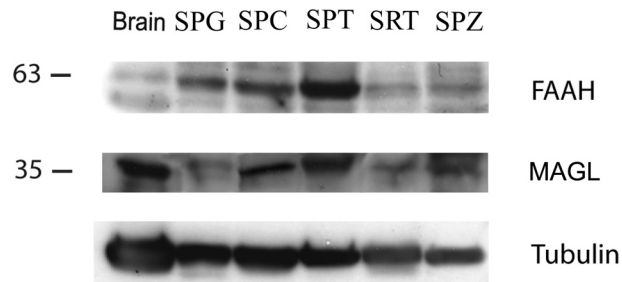

**Fig. S3.** FAAH and MAGL immunoblot analyses. Immunoblot analyses of FAAH (A) and MAGL (B) were performed as described in *Methods*. Cell extracts were prepared as described in *Methods* and in Fig. 2 legend. Cell extracts from mouse brain were used as a positive control. The molecular weights of the main bands were, as expected,  $\approx 63$  and 35 kDa for FAAH and MAGL, respectively. Tubulin was used as loading reference. SPG, spermatogonia; SPC, spermatocytes; SPT, spermatids; SRT, Sertoli cells; SPZ, cauda-epididymis spermatozoa



**Table S1. Evaluation of DAGLs, FAAH, and MAGL enzymatic activities in male germ cells at different stage of differentiation and in Sertoli cells**

| Cell type | Tot. prot*<br>( $\mu\text{g}/10^6$ cells) | Membr. prot <sup>†</sup><br>( $\mu\text{g}/10^6$ cells) | DAGLs <sup>‡</sup>  |               | FAAH <sup>‡</sup>   |             | MAGL <sup>§</sup>   |              |
|-----------|-------------------------------------------|---------------------------------------------------------|---------------------|---------------|---------------------|-------------|---------------------|--------------|
|           |                                           |                                                         | Units/ $10^6$ cells | Units/mg      | Units/ $10^6$ cells | Units/mg    | Units/ $10^6$ cells | Units/mg     |
| SPG       | 63.6                                      | 10.6 $\pm$ 16.6%                                        | 10.2 $\pm$ 0.8      | 961 $\pm$ 78  | 2.99 $\pm$ 0.01     | 282 $\pm$ 8 | 28.5 $\pm$ 0.1      | 537 $\pm$ 12 |
| SPC       | 270.6                                     | 20.6 $\pm$ 7.6%                                         | 2.1 $\pm$ 0.1       | 104 $\pm$ 38  | 5.25 $\pm$ 0.03     | 255 $\pm$ 1 | 171.0 $\pm$ 3.0     | 683 $\pm$ 14 |
| SPT       | 56.9                                      | 7.0 $\pm$ 12.3%                                         | ND                  | ND            | 1.75 $\pm$ 0.01     | 248 $\pm$ 1 | 41.6 $\pm$ 0.5      | 833 $\pm$ 9  |
| SRT       | 65.5                                      | 5.1 $\pm$ 7.7%                                          | 6.0 $\pm$ 0.1       | 1177 $\pm$ 28 | 1.12 $\pm$ 0.02     | 220 $\pm$ 1 | 26.6 $\pm$ 0.3      | 391 $\pm$ 7  |

Enzymatic activities were assayed as described in *Methods* and are expressed as units/mg of protein or units/ $10^6$  cells, taking into account the strong differences in the size and protein content exhibited by the germ cells. DAGLs, the sum of both alpha and beta isoforms in that the assay does not discriminate between the 2 enzymes. Unit is defined as the amount of enzyme that hydrolyzes 1 picomol of substrate in 1 min. SPG, spermatogonia fraction; SPC, spermatocyte fraction; SPT, spermatid fraction; SRT: Sertoli cells.

\*Total protein for  $10^6$  cells.

<sup>†</sup>Membrane protein fraction per  $10^6$  cells.

<sup>‡</sup>DAGLs and FAAH enzymatic activities were assayed by utilizing the membrane protein fraction.

<sup>§</sup>MAGL enzymatic activity was assayed by utilizing the cytoplasm protein fraction.
